# Supplementary material
Source: bioRxiv or medRxiv preprint supplement (https://www.biorxiv.org/highwire/filestream/11962/field_highwire_adjunct_files/5/044016-6.pdf)

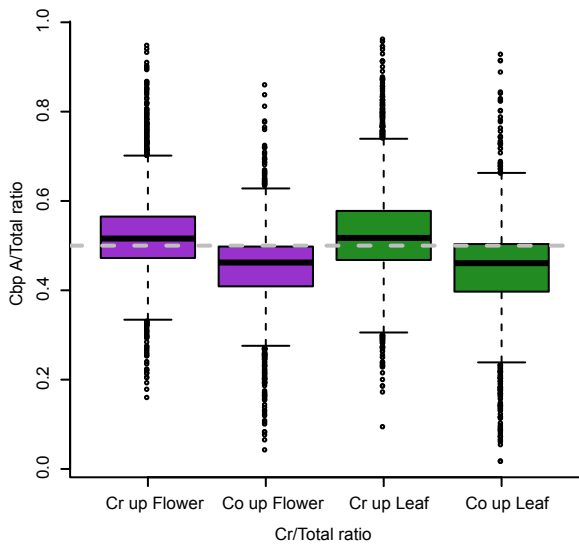

Supplement: Supplementary file [file 044016-6.pdf]
